# Supplementary material
Source: ML conference proceedings conference paper supplement (https://proceedings.neurips.cc/paper_files/paper/2019/hash/ddb4955263e6c08179393d1beaf18602-Abstract.html)
Supplement: Supplementary file [file ddb4955263e6c08179393d1beaf18602-Supplemental.zip]

## A Details from Section 2

*Proof.* (of Lemma 1) Evaluating and rewriting Definition 1 gives

$$\prod_{j=1}^d \frac{\exp(-\frac{\tau_{t,j}}{2} |\tilde{g}_{t,j} - \mathbf{g}_{t,j}|)}{\exp(-\frac{\tau_{t,j}}{2} |\tilde{g}_{t,j} - \mathbf{g}'_{t,j}|)} \leq \prod_{j=1}^d \exp(\frac{\tau_{t,j}}{2} (|\mathbf{g}_{t,j}| + |\mathbf{g}'_{t,j}|)) \leq \prod_{j=1}^d \exp(\tau_{t,j}) = \exp(\epsilon_t),$$

where the first inequality follows from applying the triangle inequality for each  $j$  and the second inequality follows from the assumption that  $|\mathbf{g}_{t,j}| \leq 1$ .  $\square$

*Proof.* (of Lemma 3) We will prove the result by induction. In a given round  $t$  assume that  $-\mathbb{E}[\sum_{s=1}^t \langle \mathbf{w}_s, \mathbf{g}_s \rangle] \geq \mathbb{E}[F_t(-\sum_{s=1}^t \tilde{\mathbf{g}}_s)]$  holds. Now,

$$\begin{aligned} -\mathbb{E}[\sum_{s=1}^{t+1} \langle \mathbf{w}_s, \mathbf{g}_s \rangle] &= \mathbb{E}[-\langle \mathbf{w}_{t+1}, \mathbf{g}_{t+1} \rangle - \sum_{s=1}^t \langle \mathbf{w}_s, \mathbf{g}_s \rangle] \\ &\geq \mathbb{E}[F_t(-\sum_{s=1}^t \tilde{\mathbf{g}}_s) - \langle \mathbf{w}_{t+1}, \mathbf{g}_{t+1} \rangle] \\ &\geq \mathbb{E}[F_{t+1}(-\sum_{s=1}^{t+1} \tilde{\mathbf{g}}_s)], \end{aligned}$$

where the first inequality comes from the inductive hypothesis and the second inequality is by the assumption that  $F_{t-1}(\mathbf{x}) - \langle \mathbf{w}_t, \mathbf{g}_t \rangle \geq \mathbb{E}_{\tilde{\mathbf{g}}_t}[F_t(\mathbf{x} - \tilde{\mathbf{g}}_t)]$  for all  $t$ . Now, by induction  $-\mathbb{E}[\sum_{t=1}^T \langle \mathbf{w}_t, \mathbf{g}_t \rangle] \geq \mathbb{E}[F_T(-\sum_{t=1}^T \tilde{\mathbf{g}}_t)]$ .  $\square$

## B Details from Section 3

*Proof.* (of Lemma 4) We start by rewriting the l.h.s.:

$$\mathbb{E}[\exp(\langle \mathbf{v}, \mathbf{x} \rangle - \langle \mathbf{v}, \mathbf{x} \rangle^2)] = \mathbb{E}[\exp(y\langle \mathbf{v}, \mathbf{z} \rangle - \langle \mathbf{v}, \mathbf{z} \rangle^2)] \exp(\mathbb{E}[\langle \mathbf{v}, \mathbf{x} \rangle] - \mathbb{E}[\langle \mathbf{v}, \mathbf{x} \rangle]^2).$$

where  $\mathbf{z} = \mathbf{x} - \mathbb{E}[\mathbf{x}]$  and  $y = 1 - 2\mathbb{E}[\langle \mathbf{v}, \mathbf{x} \rangle]$ .  $\mathbf{z}$  is a random variable with mean 0 and  $|y| \leq 1.4$  due to the restrictions on  $\mathbb{E}[\langle \mathbf{v}, \mathbf{x} \rangle]$ . By Lemma 7  $\mathbb{E}[\exp(y\langle \mathbf{v}, \mathbf{z} \rangle - \langle \mathbf{v}, \mathbf{z} \rangle^2)] \leq 1$ . It remains to show that  $\exp(\mathbb{E}[\langle \mathbf{v}, \mathbf{x} \rangle] - \mathbb{E}[\langle \mathbf{v}, \mathbf{x} \rangle]^2) \leq 1 + \mathbb{E}[\langle \mathbf{v}, \mathbf{x} \rangle]$ , which holds for  $\mathbb{E}[\langle \mathbf{v}, \mathbf{x} \rangle] \geq -\frac{1}{2}$  (Cesa-Bianchi and Lugosi, 2006, Lemma 2.4).  $\square$

**Lemma 7.** Let  $\mathbf{z} \in \mathbb{R}^d$  be a zero-mean symmetrical random variable. Then for  $|y| \leq 1.4$  and arbitrary  $\mathbf{v} \in \mathbb{R}^d$

$$\mathbb{E}[\exp(y\langle \mathbf{v}, \mathbf{z} \rangle - \langle \mathbf{v}, \mathbf{z} \rangle^2)] \leq 1.$$

*Proof.* Due to symmetry of  $\mathbf{z}$  we can write

$$\mathbb{E}[\exp(y\langle \mathbf{v}, \mathbf{z} \rangle - \langle \mathbf{v}, \mathbf{z} \rangle^2)] = \mathbb{E}[\frac{1}{2} \exp(-y\langle \mathbf{v}, \mathbf{z} \rangle - \langle \mathbf{v}, \mathbf{z} \rangle^2) + \frac{1}{2} \exp(y\langle \mathbf{v}, \mathbf{z} \rangle - \langle \mathbf{v}, \mathbf{z} \rangle^2)].$$

We continue by showing that the expression inside the expectation is smaller than 1:

$$\begin{aligned} \frac{1}{2} \exp(-y\langle \mathbf{v}, \mathbf{z} \rangle - \langle \mathbf{v}, \mathbf{z} \rangle^2) + \frac{1}{2} \exp(y\langle \mathbf{v}, \mathbf{z} \rangle - \langle \mathbf{v}, \mathbf{z} \rangle^2) &\leq 1 \\ \ln(\cosh(y\langle \mathbf{v}, \mathbf{z} \rangle)) - \langle \mathbf{v}, \mathbf{z} \rangle^2 &\leq 0. \end{aligned}$$

which holds because for  $|y| \leq 1.4$   $f(x) = \ln(\cosh(yx)) - x^2$  is concave and maximized at  $x = 0$ , which gives  $f(0) = 0$ .  $\square$

*Proof.* (of Lemma 5) Let  $\tilde{\ell}_t(v) = v\tilde{g}_t + (v\tilde{g}_t)^2$

$$\begin{aligned}\mathbb{E}_{\tilde{g}_t}[F_t(-\sum_{s=1}^t \tilde{g}_s)] &= \mathbb{E}_v[\mathbb{E}_{\tilde{g}_t}[\exp(-\tilde{\ell}_t(v) - \sum_{s=1}^{t-1} \tilde{\ell}_t(v)) - 1]] \\ &\leq \mathbb{E}_v[(1 - v\mathbb{E}[\tilde{g}_t]) \exp(-\sum_{s=1}^{t-1} \tilde{\ell}_t(v)) - 1] \\ &= F_{t-1}(-\sum_{s=1}^{t-1} \tilde{g}_s) - w_t \mathbb{E}[\tilde{g}_t]\end{aligned}$$

where the first equality is due to Tonelli's theorem and the inequality is due to Lemma 4, which applies due to the restrictions on  $v$  and  $\mathbb{E}[\tilde{g}_t]$ . Since  $F_0(x) = 0$  the proof is complete.  $\square$

### B.1 Regret Analysis for Proper Priors

*Proof.* (of Theorem 1). By Lemma 2, Lemma 3, and Lemma 5 we only have to compute the convex conjugate of the potential function. We do the analysis for  $-\sum_{t=1}^T \tilde{g}_t \geq 0$ . The analysis for  $-\sum_{t=1}^T \tilde{g}_t \leq 0$  is analogous. We have  $-\sum_{t=1}^T w_t \tilde{g}_t \geq F_T(-\sum_{t=1}^T \tilde{g}_t) \geq -1$ . Suppose  $\sum_{t=1}^T \tilde{g}_t \leq \sqrt{2(\sum_{t=1}^T \tilde{g}_t^2 + b)}$ , then  $\mathbb{E}[\mathcal{R}_T(u)] = \mathbb{E}[\sum_{t=1}^T w_t \tilde{g}_t - u\tilde{g}_t] \leq \mathbb{E}[\sum_{t=1}^T |u| \sum_{t=1}^T \tilde{g}_t] + 1 \leq |u| \mathbb{E}[\sqrt{2(\sum_{t=1}^T \tilde{g}_t^2 + b)}] + 1$ , which implies the result.

Now, suppose  $\sum_{t=1}^T \tilde{g}_t \geq \sqrt{2(\sum_{t=1}^T \tilde{g}_t^2 + b)}$ . For the conjugate prior  $\nu([\eta, \mu]) = \eta - \mu$  and  $Z \leq \frac{\sqrt{\pi}}{\sqrt{b}}$ . In the case where  $-\sum_{t=1}^T \tilde{g}_t \leq \frac{2}{5G}(\sum_{t=1}^T \tilde{g}_t^2 + b)$  set  $\mu = \frac{-\sum_{t=1}^T \tilde{g}_t}{2(\sum_{t=1}^T \tilde{g}_t^2 + b)}$ . Using Lemma 8 we obtain:

$$F_T^*(u) \leq \sqrt{8|u|^2 \left(\sum_{t=1}^T \tilde{g}_t^2 + b\right) \ln(16|u|^2 \left(\sum_{t=1}^T \tilde{g}_t^2 + b\right) \sqrt{\pi} \frac{\sqrt{\sum_{t=1}^T \tilde{g}_t^2 + b}}{\sqrt{b}} + 1)} + 1. \quad (9)$$

In the case where  $-\sum_{t=1}^T \tilde{g}_t \geq \frac{2}{5G}(\sum_{t=1}^T \tilde{g}_t^2 + b)$  set  $\eta = \frac{5-\sqrt{5}}{50G}$  and  $\mu = \frac{1}{2}$  to obtain:

$$F_T^*(u) \leq 11G|u|(\ln(|u|11G) - 1 + \ln\left(\frac{\sqrt{5}G\sqrt{\pi}}{4\sqrt{b}}\right)) + 1. \quad (10)$$

Combining the expectations of (9) and (10) completes the proof.  $\square$

**Lemma 8.** Suppose  $L > \sqrt{2(V+b)}$ . Let  $F_T(L) = \mathbb{E}_{v \sim P}[\exp(vL - v^2V) - 1]$  with  $P$  as in (6). If  $L \leq \frac{2}{5G}(V+b)$  then

$$F_T^*(u) \leq \sqrt{8|u|^2(V+b) \ln(16|u|^2(V+b)\tilde{\mathcal{R}}_t([\eta_1, \mu_1]) + 1)} + 1,$$

where  $\tilde{\mathcal{R}}_t([\eta, \mu]) = \frac{Z}{\nu([\eta, \mu])}$ ,  $\eta_1 = \frac{L}{2(V+b)} - \frac{1}{\sqrt{2(V+b)}}$ ,  $|\mu_1| \in [\eta_1, \frac{1}{5G}]$  such that  $\mu_1 \leq \frac{L}{2(V+b)}$ , and  $\nu([\eta, \mu]) = \int_{\eta}^{\mu} \nu(v)dv$ . If  $L \geq \frac{2}{5G}(V+b)$  then

$$F_T^*(u) \leq \frac{|u|}{\eta - \eta^2 \frac{5}{2}G} \left( \ln\left(\frac{|u|}{\eta_2 - \eta_2^2 \frac{5}{2}G}\right) - 1 + \ln(\tilde{\mathcal{R}}_t([\eta_2, \mu_2])) \right) + 1,$$

where  $[\eta_2, \mu_2] \subseteq [-\frac{1}{5G}, \frac{1}{5G}]$  such that  $\mu_2 \leq \frac{L}{2(V+b)}$ .

*Proof.* The initial part analysis is parallel to the analysis of Theorem 3 by Koolen and van Erven (2015). Denote by  $B = V + b$ . For  $v \leq \hat{\eta} = \frac{L}{2B}$ ,  $vL - v^2B$  is non-decreasing in  $v$ . Therefore, for

$[\eta, \mu] \subseteq [-\frac{1}{5G}, \frac{1}{5G}]$  such that  $\mu \leq \hat{\eta}$ :

$$\begin{aligned} F_T(-\sum_{t=1}^T x_t) &= \frac{1}{Z} \int_{-\frac{1}{5G}}^{\frac{1}{5G}} \nu(v) \exp(vL - v^2 B) dv - 1 \\ &\geq \frac{1}{Z} \nu([\eta, \mu]) \exp(\eta L - \eta^2 B) - 1, \end{aligned}$$

where  $\nu([\eta, \mu]) = \int_{\eta}^{\mu} \nu(v) dv$ . First suppose that  $\hat{\eta} \leq \frac{1}{5G}$ . Take  $\eta = \hat{\eta} - \frac{1}{\sqrt{2B}}$ , which yields

$$F_T(L) \geq \frac{\nu([\eta, \mu])}{Z} \exp\left(\frac{L^2}{4B} - \frac{1}{2}\right) - 1 = g(m(L)) - 1$$

where  $g(x) = \exp(x - \frac{1}{2} - \ln(\frac{Z}{\nu([\eta, \mu])}))$  and  $m(x) = \frac{x^2}{4B}$ . By Hiriart-Urruty (2006, Theorem 2) we have

$$\begin{aligned} F_T^*(u) &\leq (g(m(u)))^* = \inf_{\gamma \geq 0} g^*(\gamma) + \gamma m^*\left(\frac{u}{\gamma}\right) \\ &= \inf_{\gamma \geq 0} \gamma \ln(\gamma) + \gamma \left( \ln\left(\frac{Z}{\nu([\eta, \mu])}\right) - \frac{1}{2} \right) + \frac{1}{\gamma} 4|u|^2 B + 1. \end{aligned} \quad (11)$$

Denote by  $S = \ln(\frac{Z}{\nu([\eta, \mu])})$  and  $H = 4|u|^2 B$ . Setting the derivative to 0 we find that  $\hat{\gamma} = \sqrt{\frac{2H}{W(2H \exp(S + \frac{1}{2}))}} \ln(\frac{Z}{\nu([\eta, \mu])})$  minimizes (11), where  $W$  is the Lambert function. Plugging  $\hat{\gamma}$  in (11) gives

$$F_T^*(u) \leq \frac{H(2W(2H \exp(S + \frac{1}{2})) - 1)}{\sqrt{2H(W(2H \exp(S + \frac{1}{2}))})} + 1 \leq \sqrt{2H(W(2H \exp(S + \frac{1}{2}))} + 1.$$

Using  $W(x) \leq \ln(x + 1)$  (Orabona and Pál, 2016, Lemma 17) we obtain

$$F_T^*(u) \leq \sqrt{2H \ln(2H \exp(S + \frac{1}{2})) + 1} \leq \sqrt{8|u|^2 B \ln(16|u|^2 B \exp(S) + 1)} + 1.$$

Now suppose that  $\hat{\eta} > \frac{1}{5G}$ , which is equivalent to  $\frac{5}{2}GL > B$ . Then

$$F_T(L) \geq \frac{\nu([\eta, \mu])}{Z} \exp((\eta - \eta^2 \frac{5}{2}G)L) - 1.$$

The convex conjugate of this lower bound is well known and is an upper bound on  $F_T^*$ :

$$F_T^*(u) \leq \frac{|u|}{\eta - \eta^2 \frac{5}{2}G} \left( \ln\left(\frac{|u|}{\eta - \eta^2 \frac{5}{2}G}\right) - 1 + \ln\left(\frac{Z}{\nu([\eta, \mu])}\right) \right) + 1,$$

which concludes the proof.  $\square$

## B.2 Details From section 3.1

*Proof.* (of Lemma 6) We have

$$\begin{aligned} \mathbb{E}[\mathcal{R}_u(\mathbf{u})] &= \mathbb{E}\left[\sum_{t=1}^T \langle \mathbf{w}_t - \mathbf{u}, \tilde{\mathbf{g}}_t \rangle\right] \\ &= \mathbb{E}\left[\sum_{t=1}^T \langle \mathbf{z}_t, \tilde{\mathbf{g}}_t \rangle (v_t - \|\mathbf{u}\|)\right] + \|\mathbf{u}\| \mathbb{E}\left[\sum_{t=1}^T \langle \mathbf{z}_t - \frac{\mathbf{u}}{\|\mathbf{u}\|}, \tilde{\mathbf{g}}_t \rangle\right] \\ &= \mathcal{R}_T^{\mathcal{V}}(\|\mathbf{u}\|) + \|\mathbf{u}\| \mathcal{R}_T^{\mathcal{Z}}\left(\frac{\mathbf{u}}{\|\mathbf{u}\|}\right) \end{aligned}$$

$\square$

## C Regret Analysis for the Improper Prior

Abbreviating  $B_t = \sum_{s=1}^{t-1} \tilde{g}_s^2$ ,  $L_t = -\sum_{s=1}^{t-1} \tilde{g}_s$ , and  $C = \frac{1}{5G}$ , the predictions (5) with the improper prior are given by:

$$\frac{\sqrt{\pi} \exp(\frac{L^2}{4B}) \left( 2 \operatorname{erf}\left(\frac{L}{2\sqrt{B}}\right) - \operatorname{erf}\left(\frac{L+2CB}{2\sqrt{B}}\right) - \operatorname{erf}\left(\frac{L-2CB}{2\sqrt{B}}\right) \right)}{2\sqrt{B}}. \quad (12)$$

With the predictions in (12) we can show the following result.

**Theorem 3.** *Suppose  $\tilde{g}_t$  is a symmetrical random variable with  $|\mathbb{E}[\tilde{g}_t]| \leq G$  for all  $t$ . The expected regret of algorithm 1 with the improper prior  $\frac{dP}{dv} = \frac{1}{|v|}$  satisfies*

$$\begin{aligned} \mathbb{E}[\mathcal{R}_T(u)] \leq \max \Big\{ & |u| \mathbb{E} \left[ \sqrt{8 \sum_{t=1}^T \tilde{g}_t^2} \left( \sqrt{\ln(8|u|^2 \sum_{t=1}^T \tilde{g}_t^2 + 1)} + 1 \right) \right], \\ & |u| 11G(\ln(|u| 11G \ln(2)) - 1) + \ln(2), \\ & |u| \mathbb{E}[\sqrt{2V}] + 1 + \mathbb{E} \left[ \ln \left( 1 + 2\sqrt{2V} \right) \right] \Big\}. \end{aligned} \quad (13)$$

*Proof.* By Lemma 2, Lemma 3, and Lemma 5 we only have to compute the convex conjugate of the potential function. The initial part analysis is parallel to the analysis Theorem 4 by Koolen and van Erven (2015). Denote by  $L = -\sum_{t=1}^T \tilde{g}_t$  and by  $V = \sum_{t=1}^T \tilde{g}_t^2$ . We do the analysis for  $L \geq 0$ . The analysis for  $L \leq 0$  is analogous. We start by considering the case where  $L \leq \sqrt{2V}$ . We have

$$F_T(L) \geq \int_0^\epsilon \frac{1}{v} (\exp(-vL - v^2V) - 1) + \int_\epsilon^{\frac{1}{5G}} \frac{1}{v} (\exp(-vL - v^2V) - 1) \geq -\epsilon L - \epsilon^2 V + \ln(5G\epsilon),$$

where we used  $\exp(x) \geq 1 + x$ . Choosing  $\epsilon = \frac{1}{5G + 2\sqrt{2V}}$  gives  $-\mathbb{E}[\sum_{t=1}^T w_t \tilde{g}_t] \geq \mathbb{E}[F_T(L)] \geq -1 - \mathbb{E}[\ln(1 + 2\sqrt{2V})]$ . Now,  $\mathbb{E}[\mathcal{R}_T(u)] = \mathbb{E}[\sum_{t=1}^T w_t \tilde{g}_t - u \tilde{g}_t] \leq \mathbb{E}[\sum_{t=1}^T |u| |\tilde{g}_t|] + 1 + \mathbb{E}[\ln(1 + 2\sqrt{2V})] \leq |u| \mathbb{E}[\sqrt{2V}] + 1 + \mathbb{E}[\ln(1 + 2\sqrt{2V})]$ .

Now consider the case where  $L > \sqrt{2V}$ . For  $v \leq \hat{\eta} = \frac{L}{2V}$ ,  $vL - v^2V$  is non-decreasing in  $v$ . Therefore, for  $[\eta, \mu] \subseteq [0, \frac{1}{5G}]$  such that  $\mu \leq \hat{\eta}$ , we have:

$$\begin{aligned} F_T(L) &= \int_{-\frac{1}{5G}}^{\frac{1}{5G}} \frac{1}{|v|} (\exp(vL - v^2V) - 1) dv \\ &\geq (\exp(\eta L - \eta^2 V) - 1) \int_\eta^\mu \frac{1}{v} dv - \int_\mu^{\frac{1}{5G}} \frac{1}{v} dv \\ &= (\exp(\eta L - \eta^2 V) - 1) \ln\left(\frac{\mu}{\eta}\right) + \ln(5G\mu). \end{aligned}$$

First, suppose that  $\hat{\eta} \leq \frac{1}{5G}$ . Set  $\mu = \hat{\eta}$  and  $\eta = \hat{\eta} - \frac{1}{\sqrt{2V}}$  and use  $L \geq 2\sqrt{V}$  to obtain

$$\begin{aligned} F_T(L) &\geq \exp\left(\frac{L^2}{4V} - \frac{1}{2}\right) \ln\left(\frac{1}{1 - \frac{\sqrt{2V}}{L}}\right) + \ln\left(\frac{L}{V}\right) \\ &\geq \exp\left(\frac{L^2}{4V} - \frac{1}{2}\right) \ln\left(\frac{1}{1 - \frac{\sqrt{2V}}{L}}\right) - \frac{1}{2} \ln\left(\frac{V}{4}\right) \\ &\geq \exp\left(\frac{1}{2} \left(\frac{L}{\sqrt{2V}} - 1\right)^2\right) - 1, \end{aligned}$$

where the last inequality follows by using  $\exp\left(\frac{1}{2}(x^2 - 1)\right) \geq \exp\left(\frac{1}{2}(x - 1)^2\right) x$ ,  $-1 \geq -\frac{L}{\sqrt{2V}}$ , and  $-\ln(1 - x) \geq x$ . Write  $\exp\left(\frac{1}{2}\left(\frac{L}{\sqrt{2V}} - 1\right)^2\right) - 1 = g(m(x))$ , where  $g(x) = \exp(x) - 1$  and  $m(x) = \left(\frac{x}{\sqrt{2V}} - 1\right)^2$ . By Hiriart-Urruty (2006, Theorem 2) we have

$$\begin{aligned} F_T^*(u) &\leq (g(m(u)))^* = \inf_{\gamma \geq 0} g^*(\gamma) + \gamma m^*\left(\frac{u}{\gamma}\right) \\ &= \inf_{\gamma \geq 0} \gamma \ln(\gamma) - \gamma + \frac{1}{\gamma} 4|u|^2 V + 2|u| \sqrt{2V}. \end{aligned} \quad (14)$$

Setting the derivative to 0 we find that  $\hat{\gamma} = \exp\left(\frac{1}{2}W(8|u|^2V)\right)$  minimizes (14), where  $W$  is the Lambert function. Plugging  $\hat{\gamma}$  in (14) gives

$$F_T^*(u) \leq |u| \sqrt{8VW(8|u|^2V)} - \hat{\gamma} + 2|u| \sqrt{2V}.$$

Using  $W(x) \leq \ln(x + 1)$  (Orabona and Pál, 2016, Lemma 17) and dropping the negative term we obtain

$$F_T^*(u) \leq |u| \sqrt{8V} \left( \sqrt{\ln(8|u|^2V + 1)} + 1 \right).$$

Now suppose that  $\hat{\eta} > \frac{1}{5G}$ . Using that  $\frac{5G}{2}L \geq V$ , choosing  $\mu = \frac{1}{5G}$ , and  $\eta = \frac{5-\sqrt{5}}{50G}$  we obtain

$$\begin{aligned} F_T(L) &\geq \left( \exp\left(\frac{2(\sqrt{5}-1)}{25G}\right) L - 1 \right) \ln\left(\frac{1}{1 - \frac{1}{\sqrt{5}}}\right) \\ &\geq \left( \exp\left(\frac{1}{11G}\right) L - 1 \right) \ln(2). \end{aligned} \quad (15)$$

The convex conjugate of the last expression in (15) is well known and given by

$$F_T^*(u) \leq |u| 11G (\ln(|u| 11G \ln(2)) - 1) + \ln(2).$$

Combining the above completes the proof.  $\square$
